# Supplementary material for: Rapid identification of genes controlling virulence and immunity in malaria parasites
Source: PubMed Central journal article supplement (PMC5507557; doi:10.1371/journal.ppat.1006447), 2017-07-12
Supplement: ppat.1006447.s002.pdf [file ppat.1006447.s002.pdf]

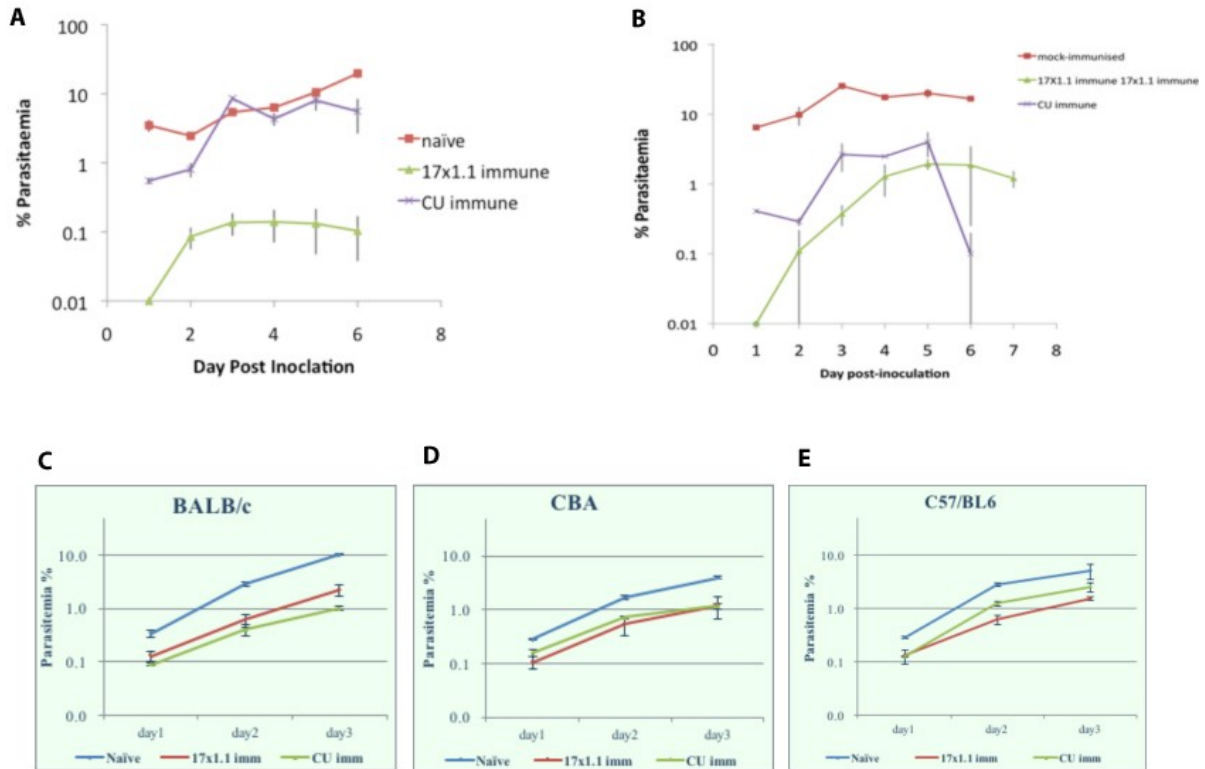

**Figure S1. Parasitaemias after immune challenges.** (A) The course of infection of 1:1 mixtures of blood stage *Plasmodium yoelii yoelii* 17x1.1 and CU parasites in mock-immunised (red line), 17x1.1 (green line) and CU (purple line) immunised mice through time. Error bars indicate standard errors of the mean of 6 mice per group. (B) The course of infection of uncloned recombinant progeny of a cross between *Plasmodium yoelii yoelii* 17x1.1 and CU parasites in mock-immunised (red line), 17x1.1 (green line) and CU (purple line) immunised mice through time. (C-E) The course of infection of 1:1 mixtures of blood stage *Plasmodium yoelii yoelii* 17x1.1 and CU parasites in mock-immunised (blue lines), 17x1.1 (red lines) and CU (green lines) immunised mice through time in BALB/c (C), CBA/n (D) and C57/BL6 (E) mice. Error bars indicate standard errors of the mean of 3 mice per group.
