# Supplementary material for: Rapid identification of genes controlling virulence and immunity in malaria parasites
Source: PubMed Central journal article supplement (PMC5507557; doi:10.1371/journal.ppat.1006447), 2017-07-12
Supplement: ppat.1006447.s003.pdf [file ppat.1006447.s003.pdf]

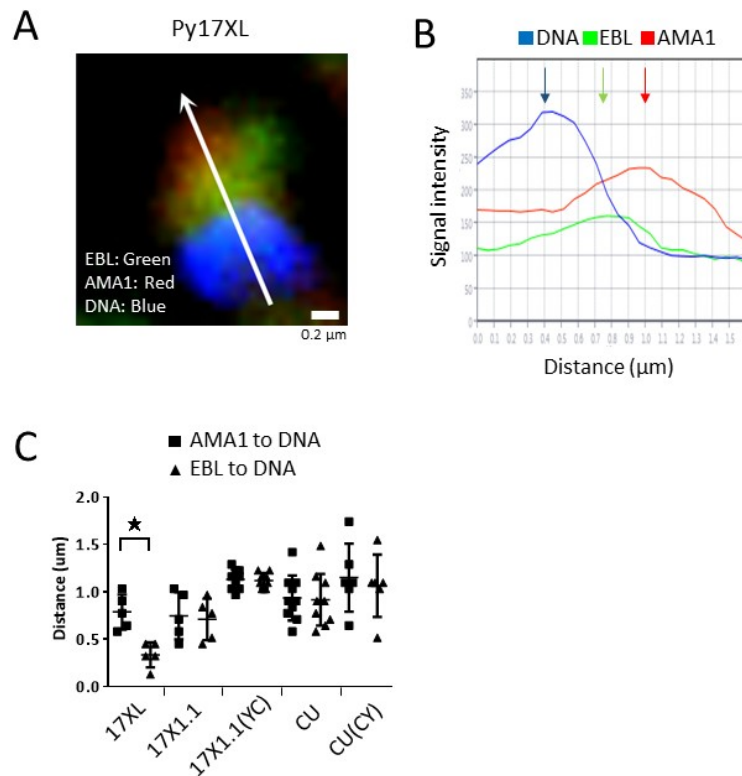

**Figure S1. Intracellular localization of EBL in parasite strains CU, 17XL, 17X1.1pp and in transfected parasites CU(CY) and 17X1.1pp(YC).** (A) Antibody-mediated staining of EBL (green), AMA1 (red) and DAPI staining of DNA (blue) inside the parasite cell in strain 17XL. (B) Intensity of fluorescent staining related to location in strain 17XL, Y-axis indicates fluorescence intensity, X-axis indicates distance along the merozoite starting from the posterior terminal end. (C) Comparisons of the distances of EBL from DNA and AMA1 from DNA in the 5 parasite strains. The distance of EBL or AMA1 from DNA measured across 5 parasite strains and between 5-9 merozoites for each strain; stars indicate  $p < 0.05$  using a Wilcoxon signed-rank test.
