# Supplementary material for: Rapid identification of genes controlling virulence and immunity in malaria parasites
Source: PubMed Central journal article supplement (PMC5507557; doi:10.1371/journal.ppat.1006447), 2017-07-12
Supplement: ppat.1006447.s008.pdf [file ppat.1006447.s008.pdf]

CHRVII

| [Gene ID]     | [Genomic Location(s)]              | [Product Description]                                                  | [# TM Domains] | [Signal Peptide] | <i>P. falciparum</i> orthologue | NS/S SNP Ratio <i>P.f.</i> |
|---------------|------------------------------------|------------------------------------------------------------------------|----------------|------------------|---------------------------------|----------------------------|
| PY17X_0720000 | Py17X_07_v2: 724,964 - 727,213 (+) | conserved Plasmodium protein, unknown function                         | 0              | NO               | PF3D7_0417900                   | 5.06                       |
| PY17X_0720100 | Py17X_07_v2: 727,812 - 742,672 (+) | conserved Plasmodium protein, unknown function                         | 2              | YES              | PF3D7_0418000                   | 2.78                       |
| PY17X_0720200 | Py17X_07_v2: 743,290 - 746,481 (-) | conserved Plasmodium protein, unknown function                         | 0              | NO               | PF3D7_0418100                   | 2.93                       |
| PY17X_0720300 | Py17X_07_v2: 749,073 - 750,377 (+) | eukaryotic translation initiation factor 3 subunit M, putative (EIF3M) | 0              | NO               | PF3D7_0418200                   | 2.14                       |
| PY17X_0720400 | Py17X_07_v2: 751,266 - 753,446 (-) | conserved Plasmodium protein, unknown function                         | 0              | NO               | PF3D7_0418300                   | 2.14                       |
| PY17X_0720500 | Py17X_07_v2: 759,308 - 759,900 (+) | conserved Plasmodium protein, unknown function                         | 0              | NO               | PF3D7_0418400                   | 3.5                        |
| PY17X_0720600 | Py17X_07_v2: 760,071 - 761,364 (-) | trafficking protein particle complex subunit 3, putative (BET3)        | 0              | NO               | PF3D7_0418500                   | 0.4                        |
| PY17X_0720700 | Py17X_07_v2: 763,162 - 767,718 (+) | regulator of chromosome condensation, putative                         | 0              | NO               | PF3D7_0418600                   | 2.14                       |
| PY17X_0720800 | Py17X_07_v2: 768,446 - 769,921 (+) | RNA-binding protein NOB1, putative                                     | 0              | NO               | PF3D7_0418700                   | 4.26                       |
| PY17X_0720900 | Py17X_07_v2: 770,582 - 772,423 (+) | RNA-binding protein NOB1, putative                                     | 2              | YES              | PF3D7_0418800                   | 0.73                       |
| PY17X_0721000 | Py17X_07_v2: 773,812 - 775,583 (+) | conserved Plasmodium protein, unknown function                         | 0              | NO               | PF3D7_0418900                   | 2.29                       |
| PY17X_0721100 | Py17X_07_v2: 776,551 - 779,153 (+) | conserved Plasmodium protein, unknown function                         | 0              | NO               | PF3D7_0419000                   | 1.16                       |
| PY17X_0721200 | Py17X_07_v2: 779,446 - 780,461 (+) | conserved Plasmodium protein, unknown function                         | 0              | NO               | PF3D7_0419100                   | 1.89                       |
| PY17X_0721300 | Py17X_07_v2: 781,850 - 782,260 (+) | CGI-141 protein homolog, putative                                      | 3              | NO               | PF3D7_0419200                   | 0                          |
| PY17X_0721400 | Py17X_07_v2: 782,903 - 784,002 (-) | conserved Plasmodium protein, unknown function                         | 0              | NO               | PF3D7_0419300                   | 1.33                       |
| PY17X_0721500 | Py17X_07_v2: 784,994 - 791,991 (+) | conserved Plasmodium protein, unknown function                         | 2              | YES              | PF3D7_0419400                   | 2.64                       |
| PY17X_0721600 | Py17X_07_v2: 792,550 - 794,133 (-) | conserved Plasmodium protein, unknown function                         | 5              | NO               | PF3D7_0419500                   | 1.35                       |
| PY17X_0721700 | Py17X_07_v2: 795,969 - 797,152 (+) | ran binding protein 1, putative                                        | 0              | NO               | PF3D7_0419600                   | 2.31                       |
| PY17X_0721800 | Py17X_07_v2: 799,281 - 800,081 (+) | apical merozoite protein, putative                                     | 2              | YES              | PF3D7_0419700                   | 1.93                       |
| PY17X_0721900 | Py17X_07_v2: 801,271 - 801,981 (-) | 60S ribosomal protein L7ae/L30e, putative                              | 0              | NO               | PF3D7_0419800                   | 1.83                       |
| PY17X_0722000 | Py17X_07_v2: 804,041 - 818,638 (+) | phosphatidylinositol 4-kinase, putative                                | 18             | NO               | PF3D7_0419900                   | 3.49                       |

**Table S4.** List of genes contained within the mathematically defined Confidence Intervals (725,528-813,866 bp) of the locus under selection on Chromosome 7.

The table shows gene ID and location for *P. yoelii*, protein description, number of Transmembrane domains, presence of a signal peptide, *P. falciparum* orthologous gene and non-synonymous to synonymous SNP ratio in *P. falciparum*
