# Supplementary material for: Rapid identification of genes controlling virulence and immunity in malaria parasites
Source: PubMed Central journal article supplement (PMC5507557; doi:10.1371/journal.ppat.1006447), 2017-07-12
Supplement: ppat.1006447.s009.pdf [file ppat.1006447.s009.pdf]

CHRVIII

| [Gene ID]     | [Genomic Location(s)]                  | [Product Description]                                            | [# TM Domains] | [Signal Peptide] | <i>P. falciparum</i> orthologue | NS/S SNP Ratio <i>P.f.</i> |
|---------------|----------------------------------------|------------------------------------------------------------------|----------------|------------------|---------------------------------|----------------------------|
| PY17X_0832800 | Py17X_08_v2: 1,228,623 - 1,232,366 (-) | conserved Plasmodium protein, unknown function                   | 2              | NO               | PF3D7_0928700                   | 3.23                       |
| PY17X_0832900 | Py17X_08_v2: 1,233,777 - 1,235,606 (+) | serine/threonine protein kinase, putative                        | 0              | NO               | PF3D7_0928800                   | 3.54                       |
| PY17X_0833000 | Py17X_08_v2: 1,236,610 - 1,237,206 (+) | guanylate kinase, putative (GK)                                  | 0              | NO               | PF3D7_0928900                   | 0.45                       |
| PY17X_0833100 | Py17X_08_v2: 1,237,965 - 1,239,388 (+) | transcription initiation factor TFIID subunit 7, putative (TAF7) | 0              | NO               | PF3D7_0929000                   | 2                          |
| PY17X_0833200 | Py17X_08_v2: 1,240,649 - 1,242,055 (+) | conserved Plasmodium protein, unknown function                   | 0              | NO               | PF3D7_0929100                   | 0.92                       |
| PY17X_0833300 | Py17X_08_v2: 1,243,623 - 1,245,309 (+) | RNA-binding protein, putative                                    | 0              | NO               | PF3D7_0929200                   | 1.63                       |
| PY17X_0833400 | Py17X_08_v2: 1,246,772 - 1,248,454 (+) | conserved Plasmodium protein, unknown function                   | 0              | NO               | PF3D7_0929300                   | 4.38                       |
| PY17X_0833500 | Py17X_08_v2: 1,249,994 - 1,255,231 (+) | high molecular weight rhoptry protein 2 (RhopH2)                 | 0              | YES              | PF3D7_0929400                   | 1.6                        |
| PY17X_0833600 | Py17X_08_v2: 1,255,518 - 1,256,536 (-) | conserved protein, unknown function                              | 0              | NO               | PF3D7_0929500                   | 1.4                        |
| PY17X_0833700 | Py17X_08_v2: 1,257,624 - 1,258,566 (-) | G2 protein, putative                                             | 0              | NO               | PF3D7_0929600                   | 0.75                       |
| PY17X_0833800 | Py17X_08_v2: 1,260,208 - 1,261,242 (-) | conserved Plasmodium protein, unknown function                   | 0              | NO               | PF3D7_0929700                   | 2.86                       |
| PY17X_0833900 | Py17X_08_v2: 1,261,874 - 1,262,170 (-) | conserved Plasmodium protein, unknown function                   | 1              | NO               | PF3D7_0929800                   | 0                          |
| PY17X_0834000 | Py17X_08_v2: 1,262,968 - 1,263,982 (+) | conserved Plasmodium protein, unknown function, fragment         | 2              | YES              | PF3D7_0929900                   | 3                          |
| PY17X_0834100 | Py17X_08_v2: 1,264,568 - 1,266,140 (+) | procollagen lysine 5-dioxygenase, putative                       | 2              | NO               | PF3D7_0930000                   | 1.71                       |
| PY17X_0834200 | Py17X_08_v2: 1,266,238 - 1,269,543 (-) | conserved Plasmodium protein, unknown function                   | 0              | YES              | PF3D7_0930100                   | 2.52                       |
| PY17X_0834300 | Py17X_08_v2: 1,270,149 - 1,272,992 (-) | leucine-rich repeat protein (LRR8)                               | 0              | NO               | PF3D7_0930200                   | 3.26                       |
| PY17X_0834400 | Py17X_08_v2: 1,276,004 - 1,281,322 (+) | merozoite surface protein 1 (MSP1)                               | 1              | YES              | PF3D7_0930300                   | 8.43                       |
| PY17X_0834500 | Py17X_08_v2: 1,282,398 - 1,285,597 (+) | conserved Plasmodium protein, unknown function                   | 0              | NO               | PF3D7_0930400                   | 3.51                       |
| PY17X_0834600 | Py17X_08_v2: 1,286,002 - 1,289,987 (-) | diacylglycerol kinase, putative                                  | 2              | NO               | PF3D7_0930500                   | 2.12                       |
| PY17X_0834700 | Py17X_08_v2: 1,291,496 - 1,293,856 (-) | peptidyl-prolyl cis-trans isomerase, putative (CYP72)            | 0              | NO               | PF3D7_0930600                   | 4.13                       |
| PY17X_0834800 | Py17X_08_v2: 1,294,482 - 1,296,023 (+) | conserved Plasmodium protein, unknown function                   | 0              | NO               | PF3D7_0930700                   | 1.92                       |
| PY17X_0834900 | Py17X_08_v2: 1,297,526 - 1,310,388 (+) | conserved Plasmodium protein, unknown function                   | 8              | NO               | PF3D7_0930800                   | 2.4                        |
| PY17X_0835000 | Py17X_08_v2: 1,315,116 - 1,316,378 (-) | conserved Plasmodium protein, unknown function                   | 0              | NO               | NONE                            | NA                         |
| PY17X_0835100 | Py17X_08_v2: 1,317,930 - 1,318,619 (-) | NifU-like protein, putative                                      | 0              | NO               | PF3D7_0930900                   | 2.2                        |
| PY17X_0835200 | Py17X_08_v2: 1,319,633 - 1,322,074 (-) | elongation factor Tu, putative                                   | 0              | NO               | PF3D7_0931000                   | 3.6                        |
| PY17X_0835300 | Py17X_08_v2: 1,323,871 - 1,325,769 (+) | nucleolar protein Nop52, putative                                | 0              | NO               | PF3D7_0931100                   | 5.24                       |
| PY17X_0835400 | Py17X_08_v2: 1,326,314 - 1,327,072 (+) | selenoprotein, putative (Sel2)                                   | 3              | YES              | PF3D7_0931200                   | 1.8                        |
| PY17X_0835500 | Py17X_08_v2: 1,328,449 - 1,329,600 (+) | conserved Plasmodium protein, unknown function                   | 0              | YES              | PF3D7_0931300                   | 2                          |
| PY17X_0835600 | Py17X_08_v2: 1,331,232 - 1,332,723 (+) | conserved Plasmodium protein, unknown function                   | 0              | NO               | PF3D7_0931400                   | 1.67                       |
| PY17X_0835700 | Py17X_08_v2: 1,333,120 - 1,334,106 (-) | conserved Plasmodium protein, unknown function                   | 2              | YES              | PF3D7_0931500                   | 0.57                       |
| PY17X_0835800 | Py17X_08_v2: 1,336,199 - 1,337,061 (+) | conserved protein, unknown function                              | 0              | NO               | PF3D7_0931600                   | 3                          |
| PY17X_0835900 | Py17X_08_v2: 1,337,701 - 1,339,975 (+) | PIH1 domain-containing protein, putative                         | 0              | NO               | PF3D7_0931700                   | 1.93                       |
| PY17X_0836000 | Py17X_08_v2: 1,340,434 - 1,341,261 (-) | proteasome subunit beta type-6, putative                         | 0              | NO               | PF3D7_0931800                   | 0.71                       |
| PY17X_0836100 | Py17X_08_v2: 1,342,693 - 1,343,945 (-) | adenylate kinase-like protein 2, putative (AKLP2)                | 0              | NO               | PF3D7_0931900                   | 1.15                       |
| PY17X_0836200 | Py17X_08_v2: 1,345,851 - 1,347,009 (+) | conserved Plasmodium protein, unknown function                   | 1              | NO               | PF3D7_0932000                   | 2.33                       |
| PY17X_0836300 | Py17X_08_v2: 1,347,152 - 1,350,626 (-) | protein MAM3, putative                                           | 4              | YES              | PF3D7_0932100                   | 2.34                       |
| PY17X_0836400 | Py17X_08_v2: 1,353,299 - 1,354,693 (+) | profilin, putative (PFN)                                         | 0              | NO               | PF3D7_0932200                   | 1                          |
| PY17X_0836500 | Py17X_08_v2: 1,355,520 - 1,357,025 (-) | M18 aspartyl aminopeptidase, putative (M18AAP)                   | 0              | NO               | PF3D7_0932300                   | 0.71                       |
| PY17X_0836600 | Py17X_08_v2: 1,358,362 - 1,359,757 (-) | peptide release factor, putative                                 | 0              | NO               | PF3D7_0932400                   | 1.75                       |
| PY17X_0836700 | Py17X_08_v2: 1,360,000 - 1,362,266 (-) | palmitoyltransferase, putative (DHHC6)                           | 5              | YES              | PF3D7_0932500                   | 1.84                       |
| PY17X_0836800 | Py17X_08_v2: 1,363,086 - 1,363,927 (-) | apicoplast ribosomal protein S6, putative (RPS6)                 | 1              | YES              | PF3D7_0932600                   | 1.33                       |

**Table S5.** List of genes contained within the mathematically defined Confidence Intervals (1,229,582 –1,363,920 bp) of the locus under selection on Chromosome 8.

The table shows gene ID and location for *P. yoelii*, protein description, number of Transmembrane domains, presence of a signal peptide, *P. falciparum* orthologous gene and non-synonymous to synonymous SNP ratio in *P. falciparum*
