# Supplementary material for: Rapid identification of genes controlling virulence and immunity in malaria parasites
Source: PubMed Central journal article supplement (PMC5507557; doi:10.1371/journal.ppat.1006447), 2017-07-12
Supplement: ppat.1006447.s010.pdf [file ppat.1006447.s010.pdf]

CHRXIII

| [Gene ID]     | [Genomic Location(s)]                  | [Product Description]                                                | [# TM Domains] | [Signal Peptide] | <i>P. falciparum</i> orthologue | NS/S SNP Ratio <i>P.f.</i> |
|---------------|----------------------------------------|----------------------------------------------------------------------|----------------|------------------|---------------------------------|----------------------------|
| PY17X_1336500 | Py17X_13_v2: 1,436,484 - 1,437,920 (-) | derlin-1, putative (DER1-1)                                          | 5              | YES              | PF3D7_1468500                   | 0.67                       |
| PY17X_1336600 | Py17X_13_v2: 1,443,231 - 1,444,793 (+) | helicase 45, putative (eIF4A)                                        | 0              | NO               | PF3D7_1468600                   | 3.74                       |
| PY17X_1336700 | Py17X_13_v2: 1,446,128 - 1,448,272 (-) | splicing factor U2AF large subunit, putative (U2AF2)                 | 0              | NO               | PF3D7_1468800                   | 1.9                        |
| PY17X_1336800 | Py17X_13_v2: 1,449,742 - 1,452,081 (-) | conserved Plasmodium protein, unknown function                       | 0              | NO               | PF3D7_1468900                   | 2.26                       |
| PY17X_1336900 | Py17X_13_v2: 1,454,106 - 1,454,600 (-) | translation initiation factor IF-1, putative (IF1)                   | 1              | YES              | PF3D7_1469000                   | 3                          |
| PY17X_1337000 | Py17X_13_v2: 1,455,848 - 1,456,606 (+) | conserved Plasmodium protein, unknown function                       | 1              | NO               | PF3D7_1469100                   | 1.67                       |
| PY17X_1337100 | Py17X_13_v2: 1,457,455 - 1,458,543 (-) | shewanella-like protein phosphatase 1, putative (SHLP1)              | 0              | YES              | PF3D7_1469200                   | 1.13                       |
| PY17X_1337200 | Py17X_13_v2: 1,459,861 - 1,460,625 (-) | small subunit rRNA processing KH domain protein, putative            | 0              | NO               | PF3D7_1469300                   | 1.27                       |
| PY17X_1337300 | Py17X_13_v2: 1,462,056 - 1,464,161 (-) | conserved Plasmodium protein, unknown function                       | 0              | NO               | PF3D7_1469500                   | 5.29                       |
| PY17X_1337400 | Py17X_13_v2: 1,466,087 - 1,469,314 (+) | duffy-binding protein                                                | 1              | YES              | NONE                            | NA                         |
| PY17X_1337500 | Py17X_13_v2: 1,471,895 - 1,481,288 (+) | biotin carboxylase subunit of acetyl CoA carboxylase, putative (ACC) | 0              | YES              | PF3D7_1469600                   | 3.6                        |
| PY17X_1337600 | Py17X_13_v2: 1,482,848 - 1,483,465 (+) | mediator of RNA polymerase II transcription subunit 6, putative      | 0              | NO               | PF3D7_1469700                   | 2.83                       |
| PY17X_1337700 | Py17X_13_v2: 1,483,690 - 1,484,728 (-) | conserved Plasmodium protein, unknown function                       | 0              | NO               | PF3D7_1469800                   | 2.36                       |
| PY17X_1337800 | Py17X_13_v2: 1,484,814 - 1,486,343 (+) | conserved Plasmodium protein, unknown function                       | 0              | NO               | PF3D7_1469900                   | 4.56                       |
| PY17X_1337900 | Py17X_13_v2: 1,486,631 - 1,487,484 (-) | autophagy-related protein 12, putative (ATG12)                       | 0              | NO               | PF3D7_1470000                   | 0                          |
| PY17X_1338000 | Py17X_13_v2: 1,488,220 - 1,494,902 (+) | conserved Plasmodium protein, unknown function                       | 2              | NO               | PF3D7_1470100                   | 2.18                       |
| PY17X_1338100 | Py17X_13_v2: 1,494,881 - 1,495,738 (-) | conserved Plasmodium protein, unknown function                       | 0              | NO               | PF3D7_1470200                   | 6.67                       |
| PY17X_1338200 | Py17X_13_v2: 1,496,691 - 1,497,032 (+) | conserved Plasmodium protein, unknown function                       | 0              | NO               | PF3D7_1470300                   | 4.33                       |
| PY17X_1338300 | Py17X_13_v2: 1,497,582 - 1,498,331 (-) | mitochondrial pyruvate carrier protein 2, putative (MPC2)            | 1              | NO               | PF3D7_1470400                   | 0.67                       |
| PY17X_1338400 | Py17X_13_v2: 1,500,315 - 1,503,383 (+) | phosphodiesterase delta (PDEdelta)                                   | 6              | NO               | PF3D7_1470500                   | 1.41                       |
| PY17X_1338500 | Py17X_13_v2: 1,504,752 - 1,505,941 (-) | RAP protein, putative                                                | 0              | NO               | PF3D7_1470600                   | 5.57                       |
| PY17X_1338600 | Py17X_13_v2: 1,507,011 - 1,508,765 (+) | conserved Plasmodium protein, unknown function                       | 0              | NO               | PF3D7_1477600                   | 2.53                       |
| PY17X_1338700 | Py17X_13_v2: 1,509,206 - 1,512,689 (-) | conserved Plasmodium protein, unknown function                       | 0              | YES              | PF3D7_1470800                   | 1.18                       |
| PY17X_1338800 | Py17X_13_v2: 1,514,819 - 1,515,658 (+) | proteasome subunit beta type-2, putative                             | 0              | NO               | PF3D7_1470900                   | 0.29                       |
| PY17X_1338900 | Py17X_13_v2: 1,517,285 - 1,518,946 (+) | RNA 3'-terminal phosphate cyclase-like protein, putative             | 0              | NO               | PF3D7_1471000                   | 1.38                       |
| PY17X_1339000 | Py17X_13_v2: 1,520,378 - 1,521,426 (-) | exported protein 2, putative (EXP2)                                  | 0              | YES              | PF3D7_1471100                   | 2.08                       |
| PY17X_1339100 | Py17X_13_v2: 1,524,724 - 1,527,216 (+) | inorganic anion antiporter, putative                                 | 11             | NO               | PF3D7_1471200                   | 0.76                       |
| PY17X_1339200 | Py17X_13_v2: 1,527,554 - 1,529,680 (-) | conserved Plasmodium protein, unknown function                       | 0              | NO               | PF3D7_1471300                   | 4.04                       |

**Table S6.** List of genes contained within the mathematically defined Confidence Intervals (1,436,717-1,528,275 bp) of the locus under selection on Chromosome 13.

The table shows gene ID and location for *P. yoelii*, protein description, number of Transmembrane domains, presence of a signal peptide, *P. falciparum* orthologous gene and non-synonymous to synonymous SNP ratio in *P. falciparum*
