# Supplementary material for: Rapid identification of genes controlling virulence and immunity in malaria parasites
Source: PLoS Pathog. 2017 Jul 12;13(7):e1006447. doi: 10.1371/journal.ppat.1006447 (PMC5507557; doi:10.1371/journal.ppat.1006447)
Supplement: S3 Fig — (PDF) [file ppat.1006447.s004.pdf]

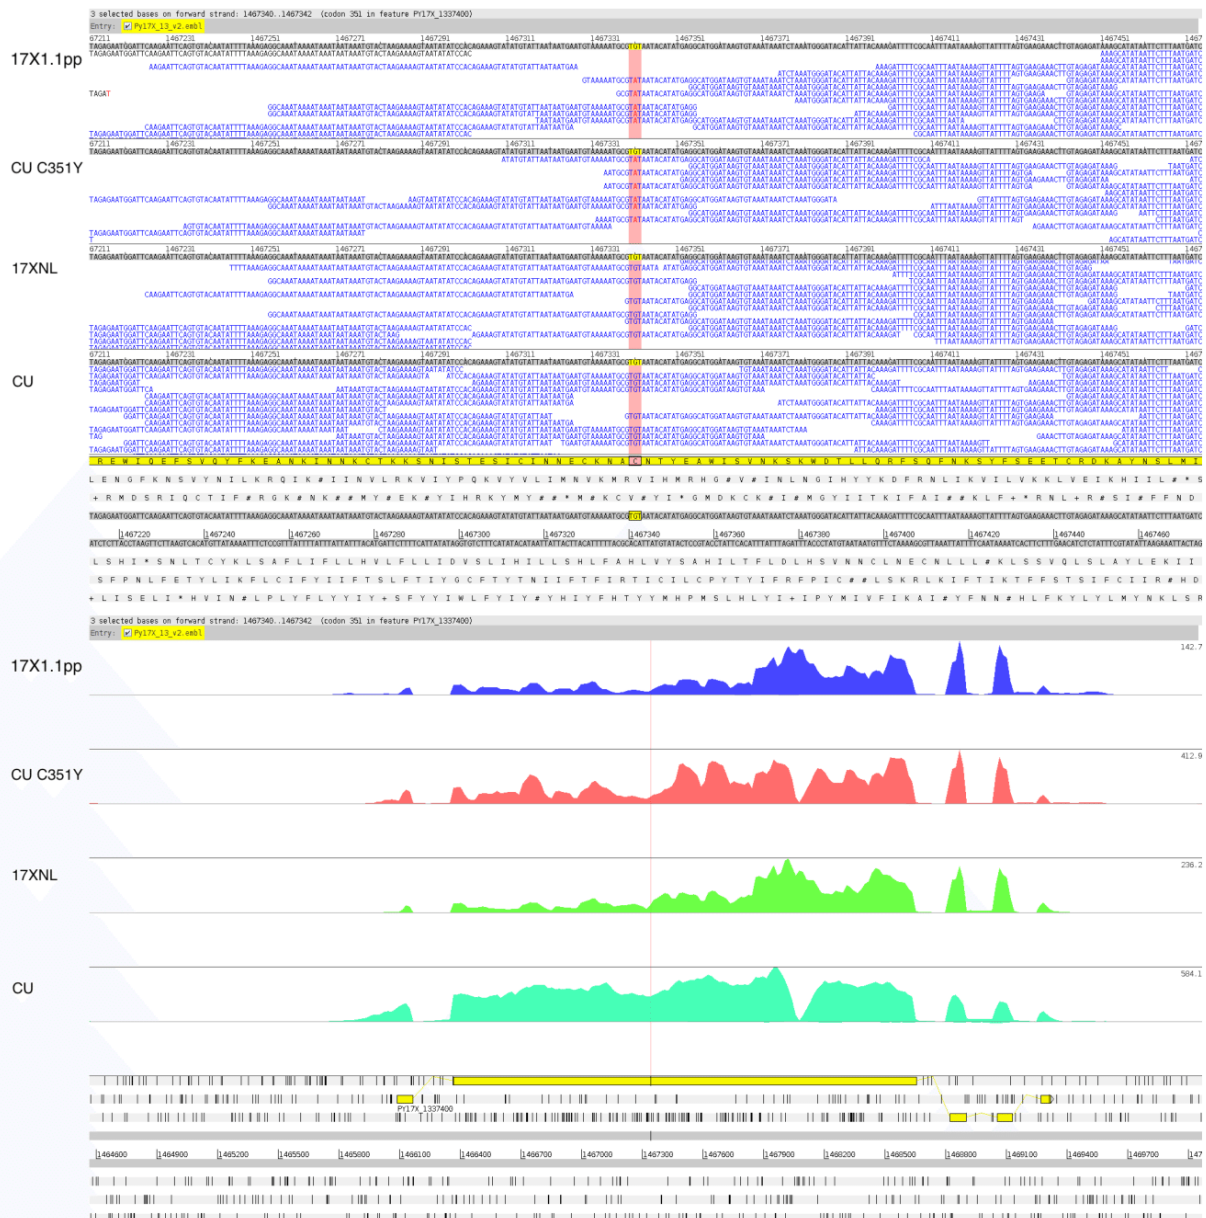

**Figure S2. Expression of Pyebl alleles in both wild type (WT) and transfected strains.** mRNA from the parental WT strains CU and 17X1.1pp, as well the CU strain transfected with the 17X1.1pp allele (CU C351Y) and the 17XNL strain (which also carries a C at position 351) was sequenced by strand-specific RNA sequencing. Reads were visualized on the genome using the Artemis software. (A) Each strain displays the expected allele at position 351 (highlighted in red) of the *Pyebl* gene. (B) The *pyebl* gene is expressed in all samples, including the transfected CU strain (CU C351Y).
