# Supplementary material for: Rapid identification of genes controlling virulence and immunity in malaria parasites
Source: PLOS journal article supplement (doi:10.1371/journal.ppat.1006447), 2017-07-12
Supplement: S7 (10.1371/journal.ppat.1006447.s007) [file journal.ppat.1006447.s007]

**Table S3.** Inferred recombination rates from driver models. Recombination rates were inferred close to selected loci within each cross population. A step-wise model of recombination was applied. Recombination rates are described as number of events per base per generation.

| Dataset (replica) | Chromosome | Recombination rate                              |                                                 |                                                 |                                                 |
|-------------------|------------|-------------------------------------------------|-------------------------------------------------|-------------------------------------------------|-------------------------------------------------|
|                   |            | (location kb)                                   | (location kb)                                   | (location kb)                                   | (location kb)                                   |
| Naïve(1)          | XIII       | $4.673 \times 10^{-6}$<br>(702.444 – 1419.502)  | $4.668 \times 10^{-7}$<br>(1419.502 – 1633.584) | $1.521 \times 10^{-5}$<br>(1633.584 – 1721.212) |                                                 |
| Naïve(2)          | XIII       | $1.878 \times 10^{-12}$<br>(702.444 – 1266.012) | $1.429 \times 10^{-6}$<br>(1266.012 – 1721.212) |                                                 |                                                 |
| 17X-immunised(1)  | VII        | $4.092 \times 10^{-5}$<br>(571.238 – 744.259)   | $3.543 \times 10^{-11}$<br>(744.259 – 851.345)  |                                                 |                                                 |
| 17X-immunised(2)  | VII        | $5.924 \times 10^{-5}$<br>(571.238 – 738.215)   | $2.384 \times 10^{-7}$<br>(738.215 – 851.345)   |                                                 |                                                 |
| 17X-immunised(1)  | VIII       | $1.780 \times 10^{-5}$<br>(1102.758 – 1227.028) | $5.814 \times 10^{-7}$<br>(1227.028 – 1371.311) | $3.202 \times 10^{-5}$<br>(1371.311 – 1523.696) |                                                 |
| 17X-immunised(2)  | VIII       | $4.266 \times 10^{-5}$<br>(1102.758 – 1186.367) | $5.313 \times 10^{-6}$<br>(1186.367 – 1331.769) | $1.930 \times 10^{-5}$<br>(1331.769 – 1523.696) |                                                 |
| 17X-immunised(1)  | XIII       | $5.250 \times 10^{-7}$<br>(702.444 – 1237.400)  | $1.057 \times 10^{-6}$<br>(1237.400 – 1603.814) | $1.254 \times 10^{-5}$<br>(1603.814 – 1721.212) |                                                 |
| 17X-immunised(2)  | XIII       | $4.383 \times 10^{-7}$<br>(702.444 – 1294.327)  | $4.235 \times 10^{-6}$<br>(1294.327 – 1443.731) | $1.178 \times 10^{-6}$<br>(1443.731 – 1615.892) | $2.035 \times 10^{-5}$<br>(1615.892 – 1721.212) |
| CU-immunised(1)   | VIII       | $3.633 \times 10^{-7}$<br>(881.993 – 1043.904)  | $7.192 \times 10^{-7}$<br>(1043.904 – 1523.696) |                                                 |                                                 |
| CU-immunised(2)   | VIII       | $8.991 \times 10^{-6}$<br>(881.993 – 1523.696)  |                                                 |                                                 |                                                 |
